# Supplementary material for: Regulation of indole‐3‐acetic acid biosynthesis and consequences of auxin production deficiency in Serratia plymuthica
Source: PubMed Central journal article supplement (PMC10364317; doi:10.1111/1751-7915.14296), 2023-06-22
Supplement: MBT2-16-1671-s001.pdf [file MBT2-16-1671-s001.pdf]

Supplementary material to:

**Regulation of indole-3-acetic acid biosynthesis and consequences of auxin production deficiency in *Serratia plymuthica***

**Miriam Rico-Jiménez<sup>1</sup>, Salvador Muñoz-Mira<sup>1</sup>, Cristina Lomas-Martínez<sup>1</sup>, Tino Krell<sup>1</sup>, Miguel A. Matilla<sup>1\*</sup>**

<sup>1</sup>Department of Biotechnology and Environmental Protection, Estación Experimental del Zaidín, Consejo Superior de Investigaciones Científicas, Prof. Albareda 1, Granada 18008, Spain.

\*Address correspondence to Miguel A. Matilla, [miguel.matilla@eez.csic.es](mailto:miguel.matilla@eez.csic.es), Tel. +34 958 526506; Fax +34 958 181609.

**Running title:** Regulation of auxin production in phytobacteria

## Supplementary Tables

**Supplementary Table S1. Bacteria, oomycete, fungi, plasmids and oligonucleotides used in this study.**

| Bacterial strains                                | Genotype or relevant characteristic <sup>a</sup>                                                                                                                                                        | Reference or source             |
|--------------------------------------------------|---------------------------------------------------------------------------------------------------------------------------------------------------------------------------------------------------------|---------------------------------|
| <i>Escherichia coli</i> DH5 $\alpha$             | <i>supE44 lacU169(Ø80lacZΔ M15) hsdR17 (r<sub>K</sub><sup>-</sup> m<sub>K</sub><sup>-</sup>) recA1 endA1 gyrA96 thi-1 relA1</i>                                                                         | (Woodcock <i>et al.</i> , 1989) |
| <i>E. coli</i> CC118λpir                         | <i>araD, Δ(ara, leu), ΔlacZ74, phoA20, galK, thi-1, rspE, rpoB, argE, recA1, λpir</i>                                                                                                                   | (Herrero <i>et al.</i> , 1990)  |
| <i>E. coli</i> BL21(DE3)                         | F <sup>-</sup> <i>ompT gal dcm lon hsdS<sub>B</sub>(r<sub>B</sub><sup>-</sup> m<sub>B</sub><sup>-</sup>) λ(DE3 [lacI lacUV5-T7p07 ind1 sam7 nin5]) [malB<sup>+</sup>]<sub>K-12</sub>(λ<sup>S</sup>)</i> | (Jeong <i>et al.</i> , 2009)    |
| <i>E. coli</i> β2163                             | F <sup>-</sup> RP4-2-Tc::Mu Δ <i>dapA</i> ::(erm-pir); Km <sup>R</sup> Em <sup>R</sup>                                                                                                                  | (Demarre <i>et al.</i> , 2005)  |
| <i>Serratia plymuthica</i> A153 LacZ             | Δ <i>lacZ</i> (1470 bp Δ). Wild type strain                                                                                                                                                             | (Matilla <i>et al.</i> , 2015)  |
| <i>S. plymuthica</i> A153 Δ <i>ipdc</i>          | A153 Δ <i>lacZ</i> , Δ <i>AWY96 RS14025</i> (previously <i>AWY96 14020</i> )                                                                                                                            | (Matilla <i>et al.</i> , 2018)  |
| <i>S. plymuthica</i> A153 Δ <i>ipdc</i> -Km      | A153 Δ <i>lacZ</i> Δ <i>ipdc</i> ::Km; Km <sup>R</sup>                                                                                                                                                  | This study                      |
| <i>S. plymuthica</i> A153 Δ <i>tyrR</i> -Km      | A153 Δ <i>lacZ</i> Δ <i>tyrR</i> ::Km; Km <sup>R</sup>                                                                                                                                                  | This study                      |
| <i>S. plymuthica</i> A153 Δ <i>AWY96 RS13985</i> | A153 Δ <i>lacZ</i> Δ <i>AWY96 RS13985</i>                                                                                                                                                               | This study                      |
| <i>S. plymuthica</i> A153 Δ <i>AWY96 RS21200</i> | A153 Δ <i>lacZ</i> Δ <i>AWY96 RS21200</i>                                                                                                                                                               | This study                      |
| <i>S. plymuthica</i> A153 Δ <i>AWY96 RS19325</i> | A153 Δ <i>lacZ</i> Δ <i>AWY96 RS19325</i> ::Km; Km <sup>R</sup>                                                                                                                                         | This study                      |
| <i>S. plymuthica</i> A153 Δ <i>rpoS</i>          | A153 Δ <i>lacZ</i> Δ <i>rpoS</i> ::Km; Km <sup>R</sup>                                                                                                                                                  | (Matilla <i>et al.</i> , 2015)  |
| <i>S. plymuthica</i> A153 Δ <i>hfg</i>           | A153 Δ <i>lacZ</i> Δ <i>hfg</i> ::Km; Km <sup>R</sup>                                                                                                                                                   | (Matilla <i>et al.</i> , 2015)  |
| <i>S. plymuthica</i> A153 Δ <i>sptI</i>          | A153 Δ <i>sptI</i>                                                                                                                                                                                      | M.A. Matilla                    |
| <i>S. plymuthica</i> A153 Δ <i>splR</i>          | A153 <i>splR</i> ::Km; Km <sup>R</sup>                                                                                                                                                                  | M.A. Matilla                    |
| <i>S. plymuthica</i> A153 Δ <i>spsR</i>          | A153 <i>spsR</i> ::Km; Km <sup>R</sup>                                                                                                                                                                  | M.A. Matilla                    |
| <i>S. plymuthica</i> A153 Δ <i>csrB</i>          | A153 Δ <i>csrB</i>                                                                                                                                                                                      | M.A. Matilla                    |
| <i>S. plymuthica</i> A153 Δ <i>pigP</i>          | A153 Δ <i>lacZ</i> Δ <i>pigP</i> ::Km; Km <sup>R</sup>                                                                                                                                                  | This study                      |
| <i>Bacillus subtilis</i> JH642                   | <i>pheA1 trpC2</i>                                                                                                                                                                                      | J.A. Hoch                       |
| <b>Fungi</b>                                     |                                                                                                                                                                                                         |                                 |
| <i>Verticillium dahliae</i> 5368                 | Wild type, plant pathogen                                                                                                                                                                               | R. Cooper                       |

<sup>a</sup>Em, erythromycin; Km, kanamycin.

**Supplementary Table S2. Plasmids used in this study.**

| Plasmids                   | Relevant characteristics <sup>a</sup>                                                                                                                                         | Source                         |
|----------------------------|-------------------------------------------------------------------------------------------------------------------------------------------------------------------------------|--------------------------------|
| pKNG101                    | Sm <sup>R</sup> ; <i>oriR6K mob sacBR</i>                                                                                                                                     | (Kaniga <i>et al.</i> , 1991)  |
| pUC18Not                   | Ap <sup>R</sup> ; identical to pUC18 but with two NotI sites flanking pUC18 polylinker                                                                                        | (Herrero <i>et al.</i> , 1990) |
| pMP220                     | Tc <sup>R</sup> ; <i>oriRK2 lacZ</i>                                                                                                                                          | (Spaink <i>et al.</i> , 1987)  |
| p34S-Km3                   | Ap <sup>R</sup> , Km <sup>R</sup> ; <i>Km3</i> antibiotic cassette                                                                                                            | (Dennis and Zylstra, 1998)     |
| pBBR1MCS-2_START           | Km <sup>R</sup> ; <i>oriRK2 mobRK2</i>                                                                                                                                        | (Obranic <i>et al.</i> , 2013) |
| pBBR1MCS-5_START           | Gm <sup>R</sup> ; <i>oriRK2 mobRK2</i>                                                                                                                                        | (Obranic <i>et al.</i> , 2013) |
| pK18mobSacB                | Km <sup>R</sup> ; <i>oriT mob sacB</i>                                                                                                                                        | (Schäfer <i>et al.</i> , 1994) |
| pMAMV140                   | Ap <sup>R</sup> ; 1.2-kb EcoRI/HindIII PCR product containing <i>pigP</i> was inserted into the same sites of pUC18Not                                                        | This study                     |
| pMAMV146                   | Ap <sup>R</sup> , Km <sup>R</sup> ; 0.95-kb SmaI fragment containing <i>km3</i> cassette of p34S-Km3 was inserted into SmaI site of <i>pigP</i> in pMAMV140                   | This study                     |
| pMAMV156                   | Sm <sup>R</sup> , Km <sup>R</sup> ; 2.2 kb NotI fragment of pMAMV146 was cloned at the same site in pKNG101                                                                   | This study                     |
| pMAMV266                   | Ap <sup>R</sup> ; 1.4-kb PCR product containing a 1098 bp in frame deletion of <i>ipdc</i> ( <i>AWY96_RS14025</i> ) of A153 inserted into the EcoRI/HindIII sites of pUC18Not | (Matilla <i>et al.</i> , 2018) |
| pMAMV364                   | Ap <sup>R</sup> , Km <sup>R</sup> ; 0.95 kb BamHI fragment containing <i>km3</i> cassette of p34S-Km3 was inserted into BamHI site of <i>ipdc</i> in pMAMV266                 | This study                     |
| pMAMV369                   | Sm <sup>R</sup> ; Km <sup>R</sup> ; 2.6-kb NotI fragment of pMAMV364 was cloned at the same site in pKNG101                                                                   | This study                     |
| pMAMV294                   | Ap <sup>R</sup> ; 1.5-kb PCR product containing a 1098 bp in frame deletion of <i>AWY96_RS21200</i> of A153 inserted into the EcoRI/HindIII sites of pUC18Not                 | This study                     |
| pMAMV297                   | Sm <sup>R</sup> ; 1.5-kb NotI fragment of pMAMV294 was cloned at the same site in pKNG101                                                                                     | This study                     |
| pUC18-ΔAWY96_RS13985       | Ap <sup>R</sup> ; 1.5-kb PCR product containing a 990 bp deletion of <i>AWY96_RS13985</i> of A153 inserted into the EcoRI/HindIII sites of pUC18Not                           | This study                     |
| pK18mobSacB-ΔAWY96_RS13985 | Km <sup>R</sup> ; 1.7-kb EcoRI/HindIII fragment of pUC18-ΔAWY96_RS13985 was cloned at the same sites in pK18mobSacB                                                           | This study                     |
| pMAMV413                   | Ap <sup>R</sup> ; 1.5-kb PCR product containing a 1156 bp deletion of <i>AWY96_RS19325</i> of A153 inserted into the EcoRI/HindIII sites of pUC18Not                          | This study                     |
| pMAMV414                   | Ap <sup>R</sup> , Km <sup>R</sup> ; 0.95 kb BamHI fragment containing <i>km3</i> cassette of p34S-Km3 was inserted into BamHI site of <i>ipdc</i> in pMAMV413                 | This study                     |
| pMAMV416                   | Sm <sup>R</sup> ; Km <sup>R</sup> ; 2.6-kb NotI fragment of pMAMV414 was cloned at the same site in pKNG101                                                                   | This study                     |
| pMAMV302                   | Tc <sup>R</sup> ; <i>ipdc</i> promoter region was cloned into the KpnI/SphI sites of pMP220                                                                                   | This study                     |
| pUC18tyrR                  | Ap <sup>R</sup> ; 2.4-kb BamHI/HindIII PCR product containing <i>tyrR</i> gene was inserted into the BamHI/HindIII sites of pUC18Not                                          | This study                     |

|                          |                                                                                                                                                                  |            |
|--------------------------|------------------------------------------------------------------------------------------------------------------------------------------------------------------|------------|
| pUC18tyrR-Km3            | Ap <sup>R</sup> , Km <sup>R</sup> ; replacement of 0.92-kb EcoRV fragment internal to <i>tyrR</i> of pUC18tyrR for a 0.9-kb SmaI <i>km3</i> cassette of p34S-Km3 | This study |
| pKNG101-tyrR             | Sm <sup>R</sup> , Km <sup>R</sup> ; 3.2 kb NotI fragment of pMAMV53 was cloned at the same site in pKNG101                                                       | This study |
| pET28b-tyrR <sup>b</sup> | Km <sup>R</sup> ; pET28b(+) derivative containing a DNA fragment encoding the TyrR (AWY96_RS22350) of A153. N-terminal His <sub>6</sub> -tag.                    | This study |
| pET28b-hpaA <sup>b</sup> | Km <sup>R</sup> ; pET28b(+) derivative containing a DNA fragment encoding the HpaA (AWY96_RS12560) of A153. N-terminal His <sub>6</sub> -tag.                    | This study |
| pET28b-hpaR <sup>b</sup> | Km <sup>R</sup> ; pET28b(+) derivative containing a DNA fragment encoding the HpaR (AWY96_RS12515) of A153. N-terminal His <sub>6</sub> -tag.                    | This study |
| pBBR-tyrR                | Gm <sup>R</sup> ; NdeI/HindIII fragment from pET28b-tyrR containing the <i>tyrR</i> gene was cloned at the same sites in pBBR1MCS-5 START                        | This study |
| pBBR-ipdc                | Km <sup>R</sup> ; NdeI/BamHI fragment containing the <i>ipdc</i> gene was cloned at the same sites in pBBR1MCS-2 START                                           | This study |

<sup>a</sup>Ap, ampicillin; Km, kanamycin; Sm, streptomycin; Tc, tetracycline; Gm, gentamicin.

<sup>b</sup>Constructed by GenScript.

**Supplementary Table S3. Oligonucleotides used in this study.**

| Name                    | Sequence (5' - 3')                     | Description                                                                                              | Source     |
|-------------------------|----------------------------------------|----------------------------------------------------------------------------------------------------------|------------|
| Ipdc-KpnI-F             | TAATGGTACCCATCATAAAGCTCCTGTAAAATTAAGGC | Forward primer to clone promoter of <i>ipdc</i> into pMP220                                              | This study |
| Ipdc-SphI-R             | TAATGCATGCCATGTGTTTCTCCGGATTTATCTC     | Reverse primer to clone promoter of <i>ipdc</i> into pMP220                                              | This study |
| PigP-EcoRI              | GATTGGAATTCCTGGTGCCAGT                 | Forward primer to generate a <i>pigP</i> mutant of A153                                                  | This study |
| PigP-HindIII            | TAATAAGCTTGCAACTCATGGCGGC              | Reverse primer to generate a <i>pigP</i> mutant of A153                                                  | This study |
| AWY96_RS13985-EcoRI-F   | TAATGAATTCGACGCTGAGCCTGACCAACC         | Forward primer to clone upstream flanking region of <i>AWY96_RS13985</i> for deletion in A153            | This study |
| AWY96_RS13985-PstI-R    | TAATCTGCAGCAGATCGGCATAGCGCAGC          | Reverse primer to clone upstream flanking region of <i>AWY96_RS13985</i> for deletion in A153            | This study |
| AWY96_RS13985-PstI-F    | TAATCTGCAGGCCAACGACACCGACTACG          | Forward primer to clone downstream flanking region of <i>AWY96_RS13985</i> for deletion in A153          | This study |
| AWY96_RS13985-HindIII-R | TAATAAGCTTCCTTACTGATGCCGCGCAG          | Reverse primer to clone downstream flanking region of <i>AWY96_RS13985</i> for deletion in A153          | This study |
| AWY96_RS21200-EcoRI-F   | TAATGAATTCGCTCAGCCCGTAGTGTTGGC         | Forward primer to clone upstream flanking region of <i>AWY96_RS21200</i> for in-frame deletion in A153   | This study |
| AWY96_RS21200-BamHI-R   | TAATGGATCCGATGGCCAGCATCACGTTGG         | Reverse primer to clone upstream flanking region of <i>AWY96_RS21200</i> for in-frame deletion in A153   | This study |
| AWY96_RS21200-BamHI-F   | TAATGGATCCGTCTGGACCAACTGTTATCACCTC     | Forward primer to clone downstream flanking region of <i>AWY96_RS21200</i> for in-frame deletion in A153 | This study |
| AWY96_RS21200-HindIII-R | TAATAAGCTTGGTGGCGTATTGGATCGCCAG        | Reverse primer to clone downstream flanking region of <i>AWY96_RS21200</i> for in-frame deletion in A153 | This study |
| AWY96_RS19325-EcoRI-F   | TAATGAATTCGAACAGTGAGGAGTACGCC          | Forward primer to clone upstream flanking region of <i>AWY96_RS19325</i> for in-frame deletion in A153   | This study |
| AWY96_RS19325-BamHI-R   | TAATGGATCCCAGTCGGTCTCAATGTTTCAGG       | Reverse primer to clone upstream flanking region of <i>AWY96_RS19325</i> for in-frame deletion in A153   | This study |
| AWY96_RS19325-BamHI-F   | TAATGGATCCCGGTGACGTCTTTAACGGC          | Forward primer to clone downstream flanking region of <i>AWY96_RS19325</i> for in-frame deletion in A153 | This study |
| AWY96_RS19325-HindIII-R | TAATAAGCTTCAACTCCAGTTGGGTATTGCC        | Reverse primer to clone downstream flanking region of <i>AWY96_RS19325</i> for in-frame deletion in A153 | This study |
| TyrR-BamHI-F            | TAATGGATCCCTGCATCAATAGCCACCGCAC        | Forward primer for <i>tyrR</i> mutation                                                                  | This study |

|                 |                                       |                                                                                  |            |
|-----------------|---------------------------------------|----------------------------------------------------------------------------------|------------|
| TyrR-HindIII-R  | TAATAAGCTTGCAGGCCATCTGCCACAGTC        | Reverse primer for <i>tyrR</i> mutation                                          | This study |
| ipdc-NdeI-F     | TAATCATATGAAAATCACTATTGGAGCCTTTATTCTG | Forward primer to complement <i>ipdc</i> mutation                                | This study |
| ipdc-BamHI-F    | TAATGGATCCCTGAGAAGCGGCGGATAAC         | Reverse primer to complement <i>ipdc</i> mutation                                | This study |
| ipdc-qPCR-F     | CAATTAGTGATCGAGGTTGCC                 | Forward primer for qRT-PCR. <i>ipdc</i> gene.                                    | This study |
| ipdc-qPCR-R     | CGCCATGTGATCATACTCAACTCG              | Reverse primer for qRT-PCR. <i>ipdc</i> gene.                                    | This study |
| RS13985-F       | CGCTGATGATCGGCATGTGG                  | Forward primer for qRT-PCR. Aldehyde dehydrogenase family protein encoding gene. | This study |
| RS13985-R       | CCAGTCACCACGTTGAATACGC                | Reverse primer for qRT-PCR. Aldehyde dehydrogenase family protein encoding gene. | This study |
| RS12565-F       | GGCGCTGACCCACTACAAC                   | Forward primer for qRT-PCR. <i>hpaB</i> gene                                     | This study |
| RS12565-R       | CCACCAGCTCATAGGAGGCG                  | Reverse primer for qRT-PCR. <i>hpaB</i> gene                                     | This study |
| RS12535-F       | CGCGAGCCGTGGAATACATC                  | Forward primer for qRT-PCR. <i>hpaD</i> gene                                     | This study |
| RS12535-R       | CGGTCATCGCGGTATCATGC                  | Reverse primer for qRT-PCR. <i>hpaD</i> gene                                     | This study |
| RS12515-F       | GCATGGAGCGCGATAAGCTG                  | Forward primer for qRT-PCR. <i>hpaR</i> gene                                     | This study |
| RS12515-R       | GCCACGTCGTACAACCTCTG                  | Reverse primer for qRT-PCR. <i>hpaR</i> gene                                     | This study |
| RS12560-F       | CAGCAATCTGGCGCTCGATATG                | Forward primer for qRT-PCR. <i>hpaA</i> gene                                     | This study |
| RS12560-R       | CCAGTTGCTGGCCGAATTCAC                 | Reverse primer for qRT-PCR. <i>hpaA</i> gene                                     | This study |
| RS22350-F       | GCGCGGTAGTCATGCTCAAG                  | Forward primer for qRT-PCR. <i>tyrR</i> gene                                     | This study |
| RS22350-R       | GGCTGACGGCCACGATATG                   | Reverse primer for qRT-PCR. <i>tyrR</i> gene                                     | This study |
| RS12485-F       | GACATGCGCGATATGACGGAG                 | Forward primer for qRT-PCR. LuxR encoding gene <i>AWY96_RS12485</i>              | This study |
| RS12485-R       | CGCGTCGCCAGTTCTATCAG                  | Reverse primer for qRT-PCR. LuxR encoding gene <i>AWY96_RS12485</i>              | This study |
| RS24485-F       | CGCAGCCATCGTCAATCAGG                  | Forward primer for qRT-PCR. <i>paaA</i> gene                                     | This study |
| RS24485-R       | CGTTAGCCATCGCCATCACC                  | Reverse primer for qRT-PCR. <i>paaA</i> gene                                     | This study |
| Pipdc-wt-ITC-F  | CCCCTGTAAAGGAGCCATTACATCAA            | Forward primer to conduct TyrR-DNA binding studies. Wild type sequence           | This study |
| Pipdc-wt-ITC-R  | TTGATGTAATGGCTCCTTTACAGGGG            | Reverse primer to conduct TyrR-DNA binding studies. Wild type sequence           | This study |
| Pipdc-mut-ITC-F | TTGACACGGCGGCTCCCACGTCGGGG            | Forward primer to conduct TyrR-DNA binding studies. Mutant sequence              | This study |
| Pipdc-mut-ITC-R | CCCCGACGTGGGAGCCGCGGTGTCAA            | Reverse primer to conduct TyrR-DNA binding studies. Mutant sequence              | This study |

**Supplementary Table S4. List of compounds that did not bind to HpaA<sub>A153</sub>, HpaR<sub>A153</sub> and TyrR<sub>A153</sub> as determined by isothermal titration calorimetry.**

| <b>Protein</b>             | <b>Ligand</b>                  |
|----------------------------|--------------------------------|
| <b>HpaA<sub>A153</sub></b> | Phenylacetic acid              |
|                            | 3,4-dihydroxyphenylacetic acid |
|                            | 3-methylbenzoic acid           |
|                            | Benzoic acid                   |
|                            | Salicylic acid                 |
|                            | Indole-3-acetic acid           |
|                            | Indole-3-pyruvic acid          |
| <b>HpaR<sub>A153</sub></b> | 4-hydroxybenzoic acid          |
|                            | 3-hydroxyphenylacetic acid     |
|                            | Phenylacetic acid              |
|                            | 3,4-dihydroxyphenylacetic acid |
|                            | 3-methylbenzoic acid           |
|                            | Benzoic acid                   |
|                            | Salicylic acid                 |
|                            | Indole-3-acetic acid           |
|                            | Indole-3-pyruvic acid          |
| <b>TyrR<sub>A153</sub></b> | Indole-3-acetic acid           |

## Supplementary Figures

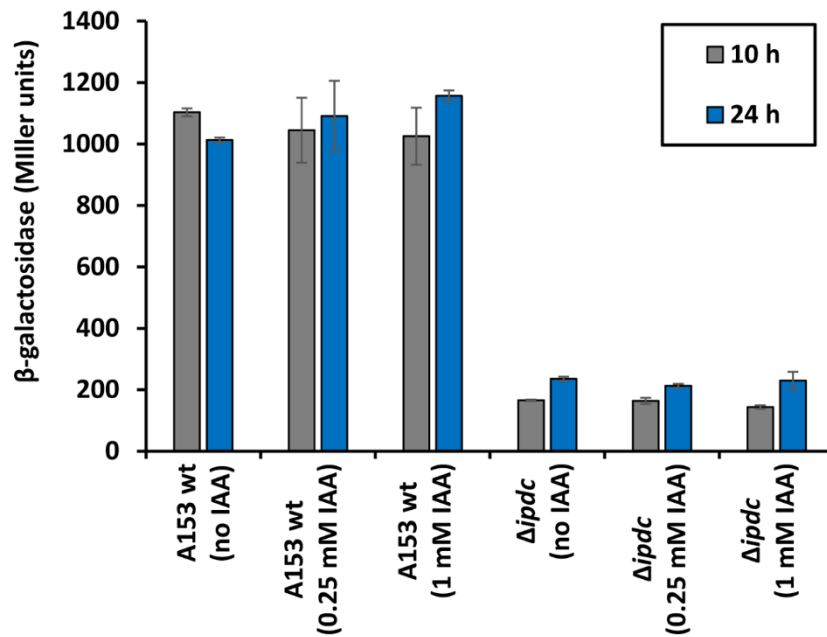

**Fig. S1. The expression of the *ipdc* gene of *Serratia plymuthica* A153 is not affected by the exogenous addition of indole-3-acetic acid (IAA).** Transcription of the *ipdc* ( $P_{ipdc}::lacZ$ ; pMAMV302) promoter in LB medium at 30 °C in the absence and presence of different concentrations of IAA. Data are the mean and standard deviation of three biological replicates. No significant differences were found in the presence and absence of exogenous IAA. Wt, wild-type.



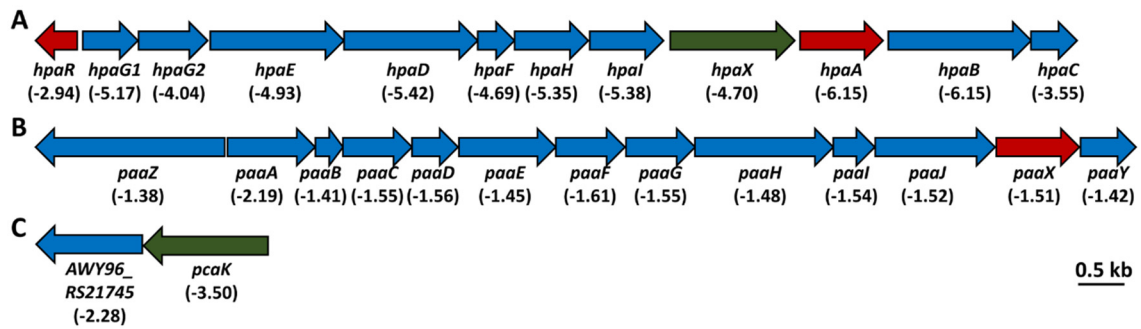

**Fig. S2: Genetic organization of the 4-hydroxyphenylacetic acid (A), phenylacetic acid (B) and 4-hydroxybenzoate (C) catabolic gene clusters in *Serratia plymuthica* A153.** Numbers in brackets correspond to the results of the RNA-seq studies (*ipdc* mutant versus A153 wild type). Green: transporter/permease; red, regulatory protein; blue: catabolic genes.

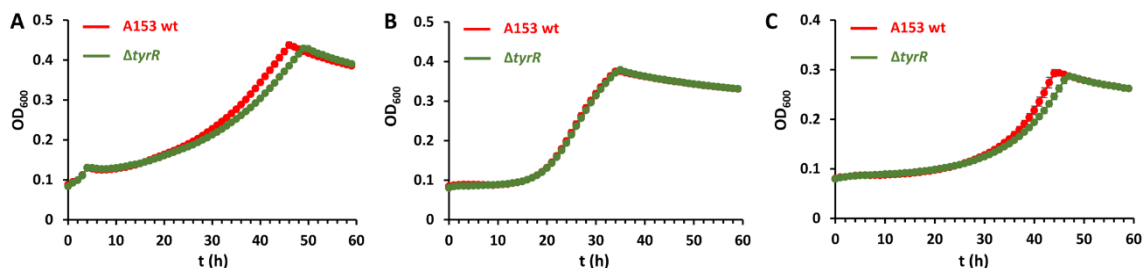

**Fig. S3. Growth curves of *Serratia plymuthica* A153 strains in minimal medium with phenylacetic acid (PAA), 4-hydroxyphenylacetic acid (4HPA) and 4-hydroxybenzoic acid (4HBA) as sole carbon sources.** Growth experiments were conducted in 100-well plates in minimal medium supplemented with 5 mM of PAA (A), 4HPA (B) and 4HBA (C). Data represent growth for 60 h. Cells were grown at 30 °C using a Bioscreen microbiological growth analyzer (Oy Growth Curves Ab Ltd., Helsinki, Finland) under continuous shaking. Wt, wild-type; OD<sub>600</sub>, optical density at 600 nm.

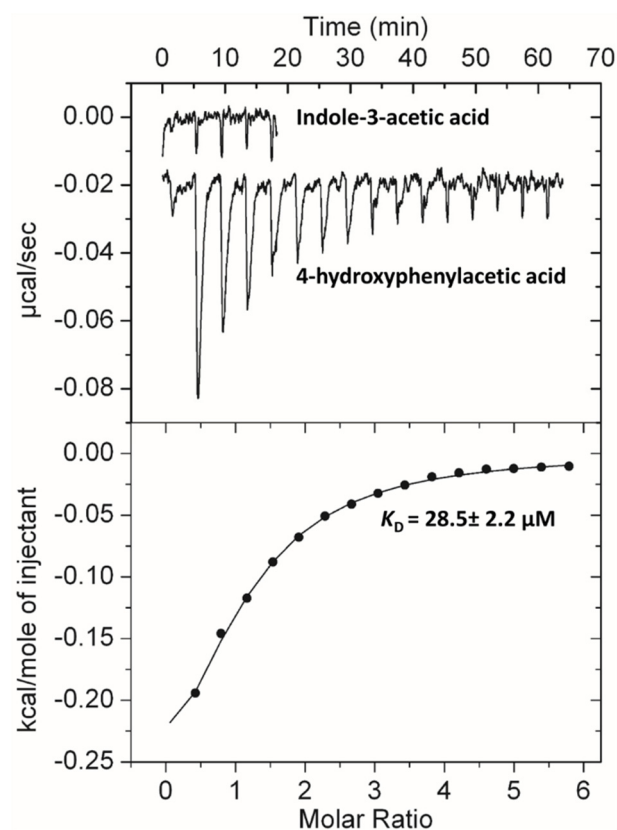

**Fig. S4. Isothermal titration calorimetry study of the binding of different ligands to HpaA of *Serratia plymuthica* A153.** Upper panel: Raw data for the titration of 22 to 36  $\mu\text{M}$  HpaA with 8- to 9.6- $\mu\text{L}$  aliquots of 2 to 3 mM ligand solutions. Lower panel: Integrated, dilution heat-corrected and concentration-normalized peak areas fitted using 'One binding site' of the MicroCal version of ORIGIN. Thermodynamic parameters are shown in Table 2.

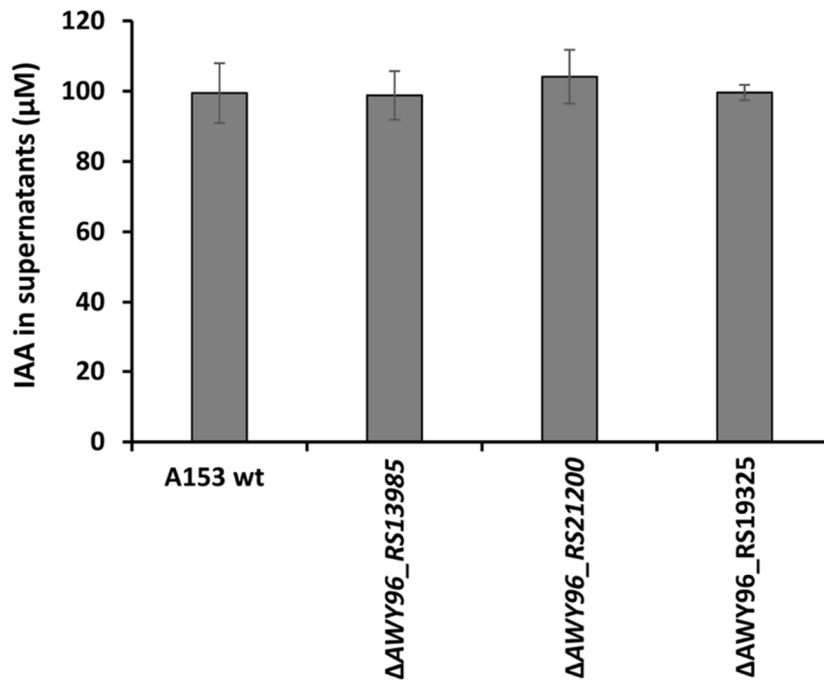

**Fig. S5. Role of different aldehyde dehydrogenases in IAA production in *S. plymuthica* A153.** Assays were performed in LB broth in the presence of 1 mg/mL L-Trp. Means and standard deviations of three biological replicates are shown. Samples were taken after 24 h incubations at 30 °C. No significant differences were found in the levels of IAA between A153 strains. Wt, wild-type.

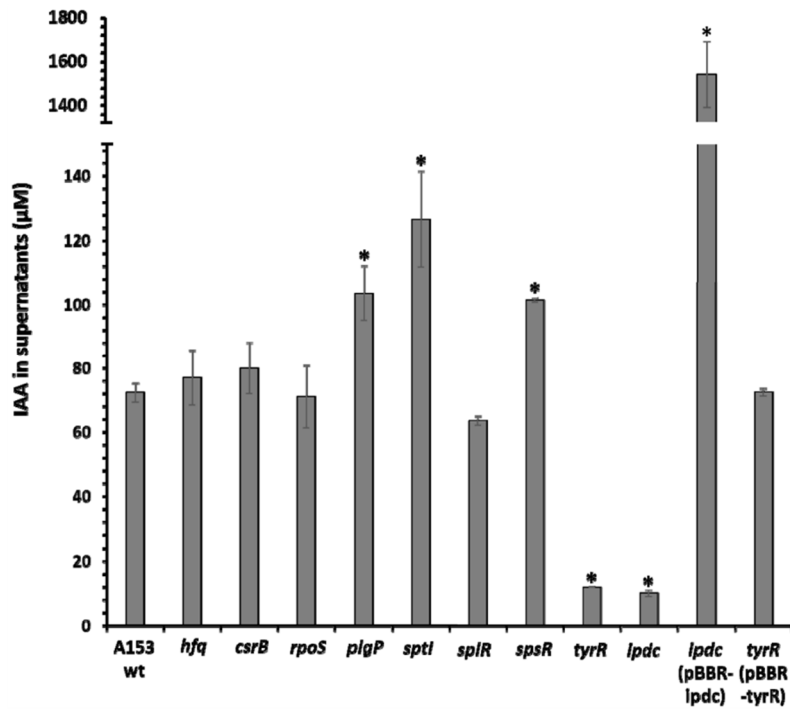

**Fig. S6. Indole-3-acetic acid production by different *Serratia plymuthica* A153 strains.** Assays were performed in LB broth in the presence of 1 mg/mL L-tryptophan. Means and standard deviations of three biological replicates are shown. Samples were taken after 24 h incubations at 30 °C. \*P < 0.01, Student's t-test of mutant strains with respect to the A153 wild-type strain. Wt, wild-type.

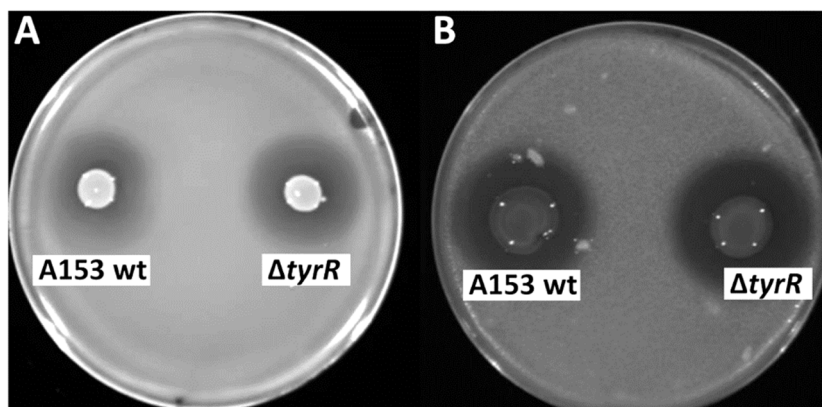

**Figure S7. Antibacterial and antifungal properties of *Serratia plymuthica* A153 strains.** Shown are the antimicrobial activities against *Bacillus subtilis* (A) and *Verticillium dahliae* (B) after 24 h and 96 h of growth at 25 °C, respectively.

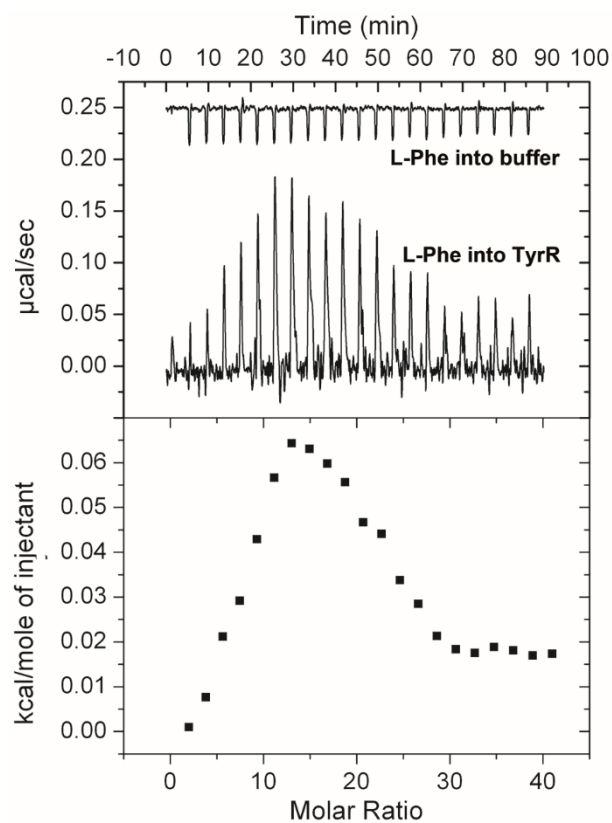

**Figure S8. Isothermal titration calorimetry study of the binding of L-Phe to TyrR<sub>A153</sub>.** Upper panel: Raw data for the titration of 50  $\mu\text{M}$  TyrR<sub>A153</sub> with 12.8- $\mu\text{L}$  aliquots of 10 mM L-Phe. Lower panel: Integrated, dilution heat-corrected and concentration-normalized peak areas. No satisfactory fit was obtained with models in the SEDPHAT (Zhao *et al.*, 2015) or the ORIGIN software (MicroCal). L-Phe, L-Phenylalanine.

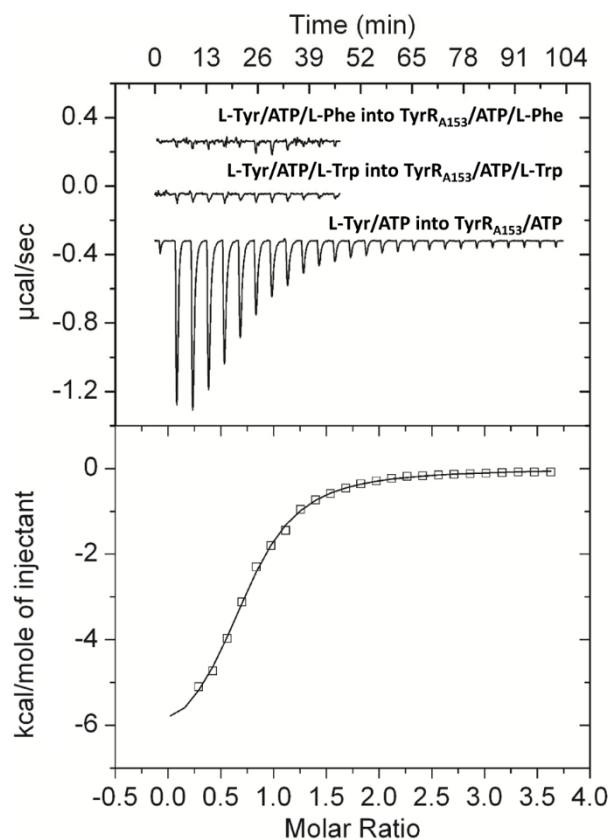

**Figure S9. L-Phe and L-Trp compete with L-Tyr for binding to the ATP-dependent binding site of TyrR<sub>A153</sub>.** Shown are the results from isothermal titration calorimetry analysis of the binding of L-Tyr to the ATP-dependent binding site of TyrR<sub>A153</sub> in the presence and absence of 10 mM L-Phe or L-Trp. Upper panel: titration raw data for the injection of 4.8-12.8  $\mu$ L aliquots of 1 mM L-Tyr into 50  $\mu$ M TyrR<sub>A153</sub> in the absence and presence of 10 mM L-Phe or L-Trp (present in both the injector syringe and sample cell). Lower panel: integrated, dilution heat-corrected and concentration-normalized peak areas fitted with the “One binding site” model of ORIGIN. In all cases, 1 mM ATP was present both in the injector syringe and sample cell. L-Phe, L-Phenylalanine; L-Trp, L-Tryptophan; L-Phe, L-Phenylalanine.

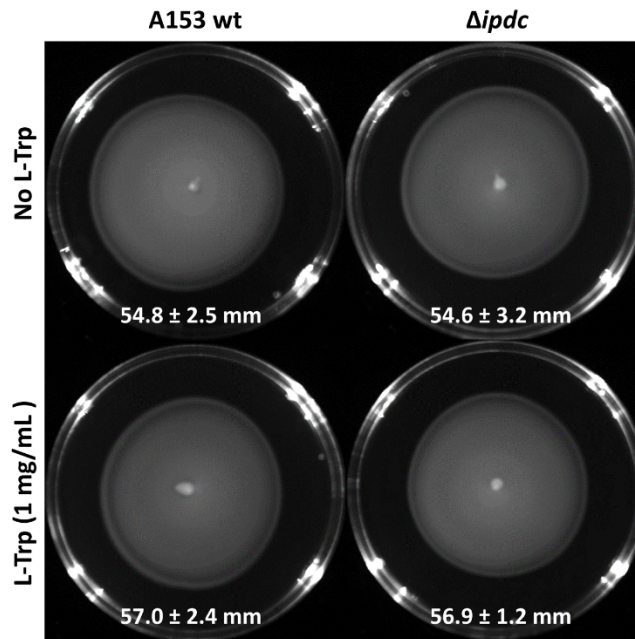

**Fig. S10. Swimming motility after of *Serratia plymuthica* A153 strains in the presence and absence of 1 mg/mL L-tryptophan.** Numerical values at the bottom of each bioassay represent the mean and standard deviation of halo diameters from three biological replicates. Each of these assays was conducted three times and representative images are shown. No significant differences in swimming motility were found between A153 strains. Pictures were taken after 24 h of incubation at 30 °C. L-Trp, L-tryptophan; wt, wild-type.

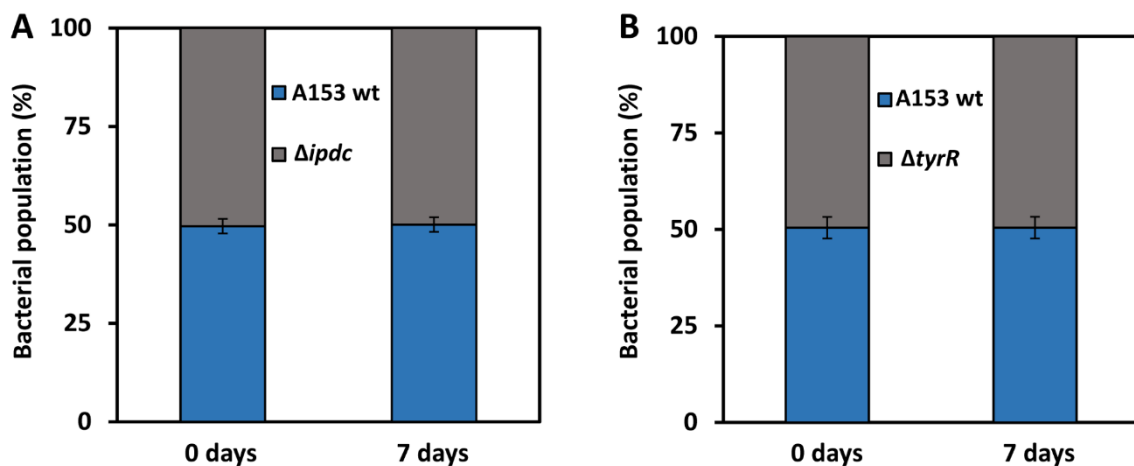

**Fig. S11. Competitive root colonization of *Serratia plymuthica* A153 and mutants defective in *ipdc* (A) and *tyrR* (B).** The figures present the percentage of bacteria recovered from the rhizosphere of maize (*Zea mays*) plants. Data are the means and standard deviations of six plants. No significant differences in the rhizosphere colonization levels were found between A153 strains. Wt, wild-type.

## REFERENCES

- Demarre, G., Guerout, A.M., Matsumoto-Mashimo, C., Rowe-Magnus, D.A., Marliere, P., and Mazel, D. (2005) A new family of mobilizable suicide plasmids based on broad host range R388 plasmid (IncW) and RP4 plasmid (IncPalpha) conjugative machineries and their cognate *Escherichia coli* host strains. *Res Microbiol* **156**: 245–255.
- Dennis, J.J. and Zylstra, G.J. (1998) Plasposons: modular self-cloning minitransposon derivatives for rapid genetic analysis of gram-negative bacterial genomes. *Appl Environ Microbiol* **64**: 2710–2715.
- Herrero, M., de Lorenzo, V., and Timmis, K.N. (1990) Transposon vectors containing non-antibiotic resistance selection markers for cloning and stable chromosomal insertion of foreign genes in gram-negative bacteria. *J Bacteriol* **172**: 6557–6567.
- Jeong, H., Barbe, V., Lee, C.H., Vallenet, D., Yu, D.S., Choi, S.H., et al. (2009) Genome sequences of *Escherichia coli* B strains REL606 and BL21(DE3). *J Mol Biol* **394**: 644–652.
- Kaniga, K., Delor, I., and Cornelis, G.R. (1991) A wide-host-range suicide vector for improving reverse genetics in Gram-negative bacteria: inactivation of the *blaA* gene of *Yersinia enterocolitica*. *Gene* **109**: 137–141.
- Matilla, M.A., Daddaoua, A., Chini, A., Morel, B., and Krell, T. (2018) An auxin controls bacterial antibiotics production. *Nucleic Acids Res* **46**: 11229–11238.
- Matilla, M.A., Leeper, F.J., and Salmond, G.P. (2015) Biosynthesis of the antifungal haterumalide, oocydin A, in *Serratia*, and its regulation by quorum sensing, RpoS and Hfq. *Environ Microbiol* **17**: 2993–3008.
- Obranic, S., Babic, F., and Maravic-Vlahovicek, G. (2013) Improvement of pBBR1MCS plasmids, a very useful series of broad-host-range cloning vectors. *Plasmid* **70**: 263–267.
- Schäfer, A., Tauch, A., Jäger, W., Kalinowski, J., Thierbach, G., and Pühler, A. (1994) Small mobilizable multi-purpose cloning vectors derived from the *Escherichia coli*



plasmids pK18 and pK19: selection of defined deletions in the chromosome of *Corynebacterium glutamicum*. *Gene* **145**: 69–73.

Spaink, H.P., Okker, R.J., Wijffelman, C.A., Pees, E., and Lugtenberg, B.J. (1987) Promoters in the nodulation region of the *Rhizobium leguminosarum* Sym plasmid pRL1J1. *Plant Mol Biol* **9**: 27–39.

Woodcock, D.M., Crowther, P.J., Doherty, J., Jefferson, S., DeCruz, E., Noyer-Weidner, M., et al. (1989) Quantitative evaluation of *Escherichia coli* host strains for tolerance to cytosine methylation in plasmid and phage recombinants. *Nucleic Acids Res* **17**: 3469–3478.
